# Supplementary material
Source: HighWire-hosted journal article supplement (https://bibliotheek.ehb.be/content/92/6/455)
Supplement: inline-supplementary-material-1 [file inline-supplementary-material-1.pdf]

## Men who have sex with men in Britain: comparison of estimates from a probability sample and community-based surveys

Supplementary Table S1: Demographic characteristics of MSM who identify as gay: Convenience surveys relative to Natsal-3

|                                                     | Natsal-3               | EMIS         | London-GMSHS | Scotland-GMSHS |
|-----------------------------------------------------|------------------------|--------------|--------------|----------------|
| <b>Median age (IQR)</b>                             | 34 (26 - 46)           | 36 (27 - 45) | 33 (27 -40)  | 30 (24 - 40)   |
| <b>Age group</b>                                    |                        |              |              |                |
| 18-24                                               | 17.0% (10.2% to 26.9%) | 15.4%        | 12.5%        | 26.7%          |
| 25-34                                               | 34.3% (24.6% to 45.6%) | 31.0%        | 43.0%        | 36.4%          |
| 25-44                                               | 18.7% (9.8% to 32.9%)  | 27.8%        | 31.0%        | 22.3%          |
| 45-64                                               | 30.0% (20.3% to 42.0%) | 25.8%        | 13.6%        | 14.6%          |
| P-value                                             |                        | 0.450        | 0.002        | 0.014          |
| <b>Academic qualifications</b>                      |                        |              |              |                |
| Degree level qualification                          | 38.2% (27.1% to 50.6%) | 48.7%        |              | 46.4%          |
| Higher education, A-level or equivalent             | 24.7% (15.8% to 36.4%) | 33.3%        |              | 37.4%          |
| GCSE, O-Level or equivalent                         | 29.1% (20.2% to 39.9%) | 15.6%        |              | 14.6%          |
| None                                                | 8.1% (3.6% to 17.0%)   | 2.5%         |              | 1.5%           |
| P-value                                             |                        | <0.001       |              | <0.001         |
| <b>Employment</b>                                   |                        |              |              |                |
| Employed                                            | 66.7% (55.6% to 76.3%) | 67.6%        | 88.3%        | 71.5%          |
| Other/Unemployed                                    | 33.3% (23.7% to 44.4%) | 32.4%        | 11.7%        | 28.5%          |
| P-value                                             |                        | 0.872        | <0.001       | 0.291          |
| <b>Ethnicity (binary)</b>                           |                        |              |              |                |
| White                                               | 98.3% (88.9% to 99.8%) |              | 84.4%        |                |
| Non-white                                           | 1.7% (0.2% to 11.1%)   |              | 15.6%        |                |
| P-value                                             |                        |              | 0.004        |                |
| <b>London resident</b>                              |                        |              |              |                |
| No                                                  | 75.1% (61.3% - 85.1)   | 60.4%        |              |                |
| Yes                                                 | 24.9% (14.9-38.7)      | 39.6%        |              |                |
| P-value                                             |                        | 0.035        |              |                |
| <b>Urban area</b>                                   |                        |              |              |                |
| Rural or Town area (<10,000)                        | 11.0% (6.0% to 19.3%)  | 8.8%         | 17.2%        | 9.5%           |
| Urban area (>10,000)                                | 89.0% (80.7% to 94.0%) | 91.2%        | 82.8%        | 90.5%          |
| P-value                                             |                        | 0.467        |              | 0.126          |
| <b>Country</b>                                      |                        |              |              |                |
| England                                             | 85.0% (74.8% to 91.6%) | 90.1%        |              |                |
| Scotland                                            | 7.4% (3.6% to 14.7%)   | 6.9%         |              |                |
| Wales                                               | 7.5% (3.0% to 17.6%)   | 3.0%         |              |                |
| P-value                                             |                        | 0.075        |              |                |
| <b>Attraction scale</b>                             |                        |              |              |                |
| Opposite sex only                                   | 0% ( )                 | 0.0%         |              |                |
| More often opposite sex, and at least once same sex | 0.6% (0.1% to 3.9%)    | 0.0%         |              |                |
| About equally often to opposite sex and same sex    | 0.9% (0.1% to 5.9%)    | 0.1%         |              |                |
| More often same sex, and at least once opposite sex | 42.8% (31.8% to 54.5%) | 10.9%        |              |                |
| Same sex only                                       | 55.8% (44.1% to 66.9%) | 89.0%        |              |                |
| P-value                                             |                        | <0.001       |              |                |
| <b>Denominator</b>                                  | 98, 93                 | 13088        | 752          | 1119           |

p values:  $\chi^2$  test compared to Natsal-3
